# Supplementary material
Source: PubMed Central journal article supplement (PMC2720748)

**Supplementary Fig. 1**

The subgraph showing top 10 GO terms identified by the elim algorithm for scoring GO terms for enrichment of Biological Process (Fig. 1a) and Molecular function (Fig. 1b). Boxes indicate the 10 most significant terms. The box color represents the relative significance, ranging from dark red (most significant) to light yellow (least significant). Black arrows indicate is a relationships and red arrows part of relationships.

Supplementary Figure 1a: GO terms for the Biological Process

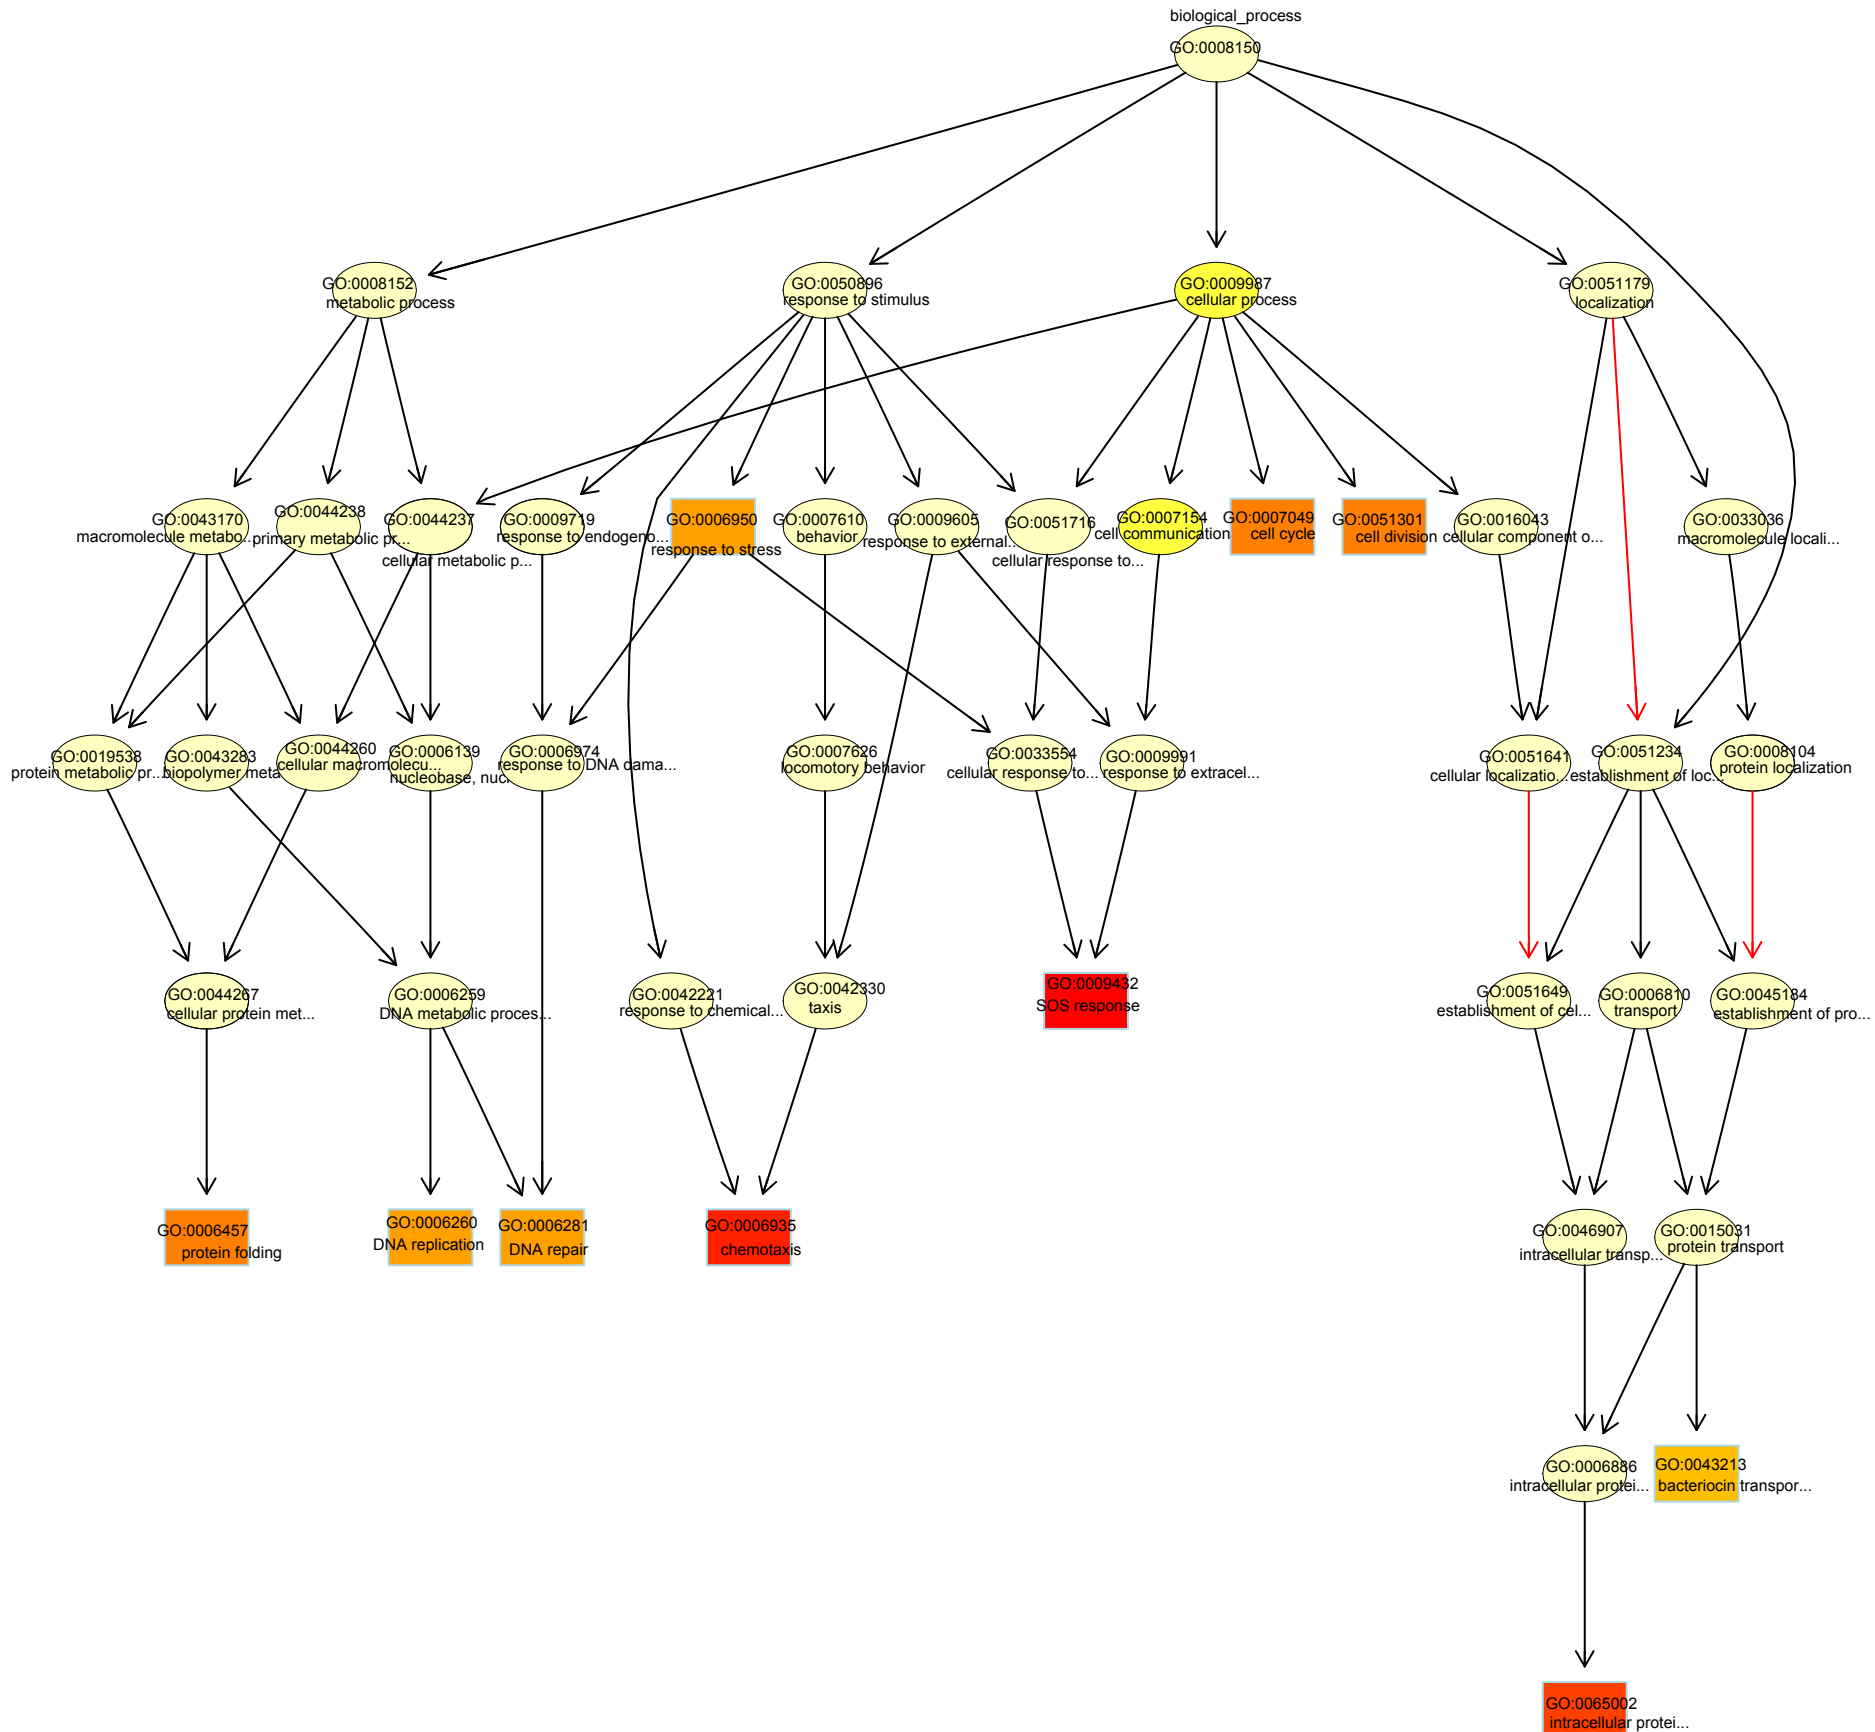

Supplementary Figure 1b: GO terms for the Molecular Function

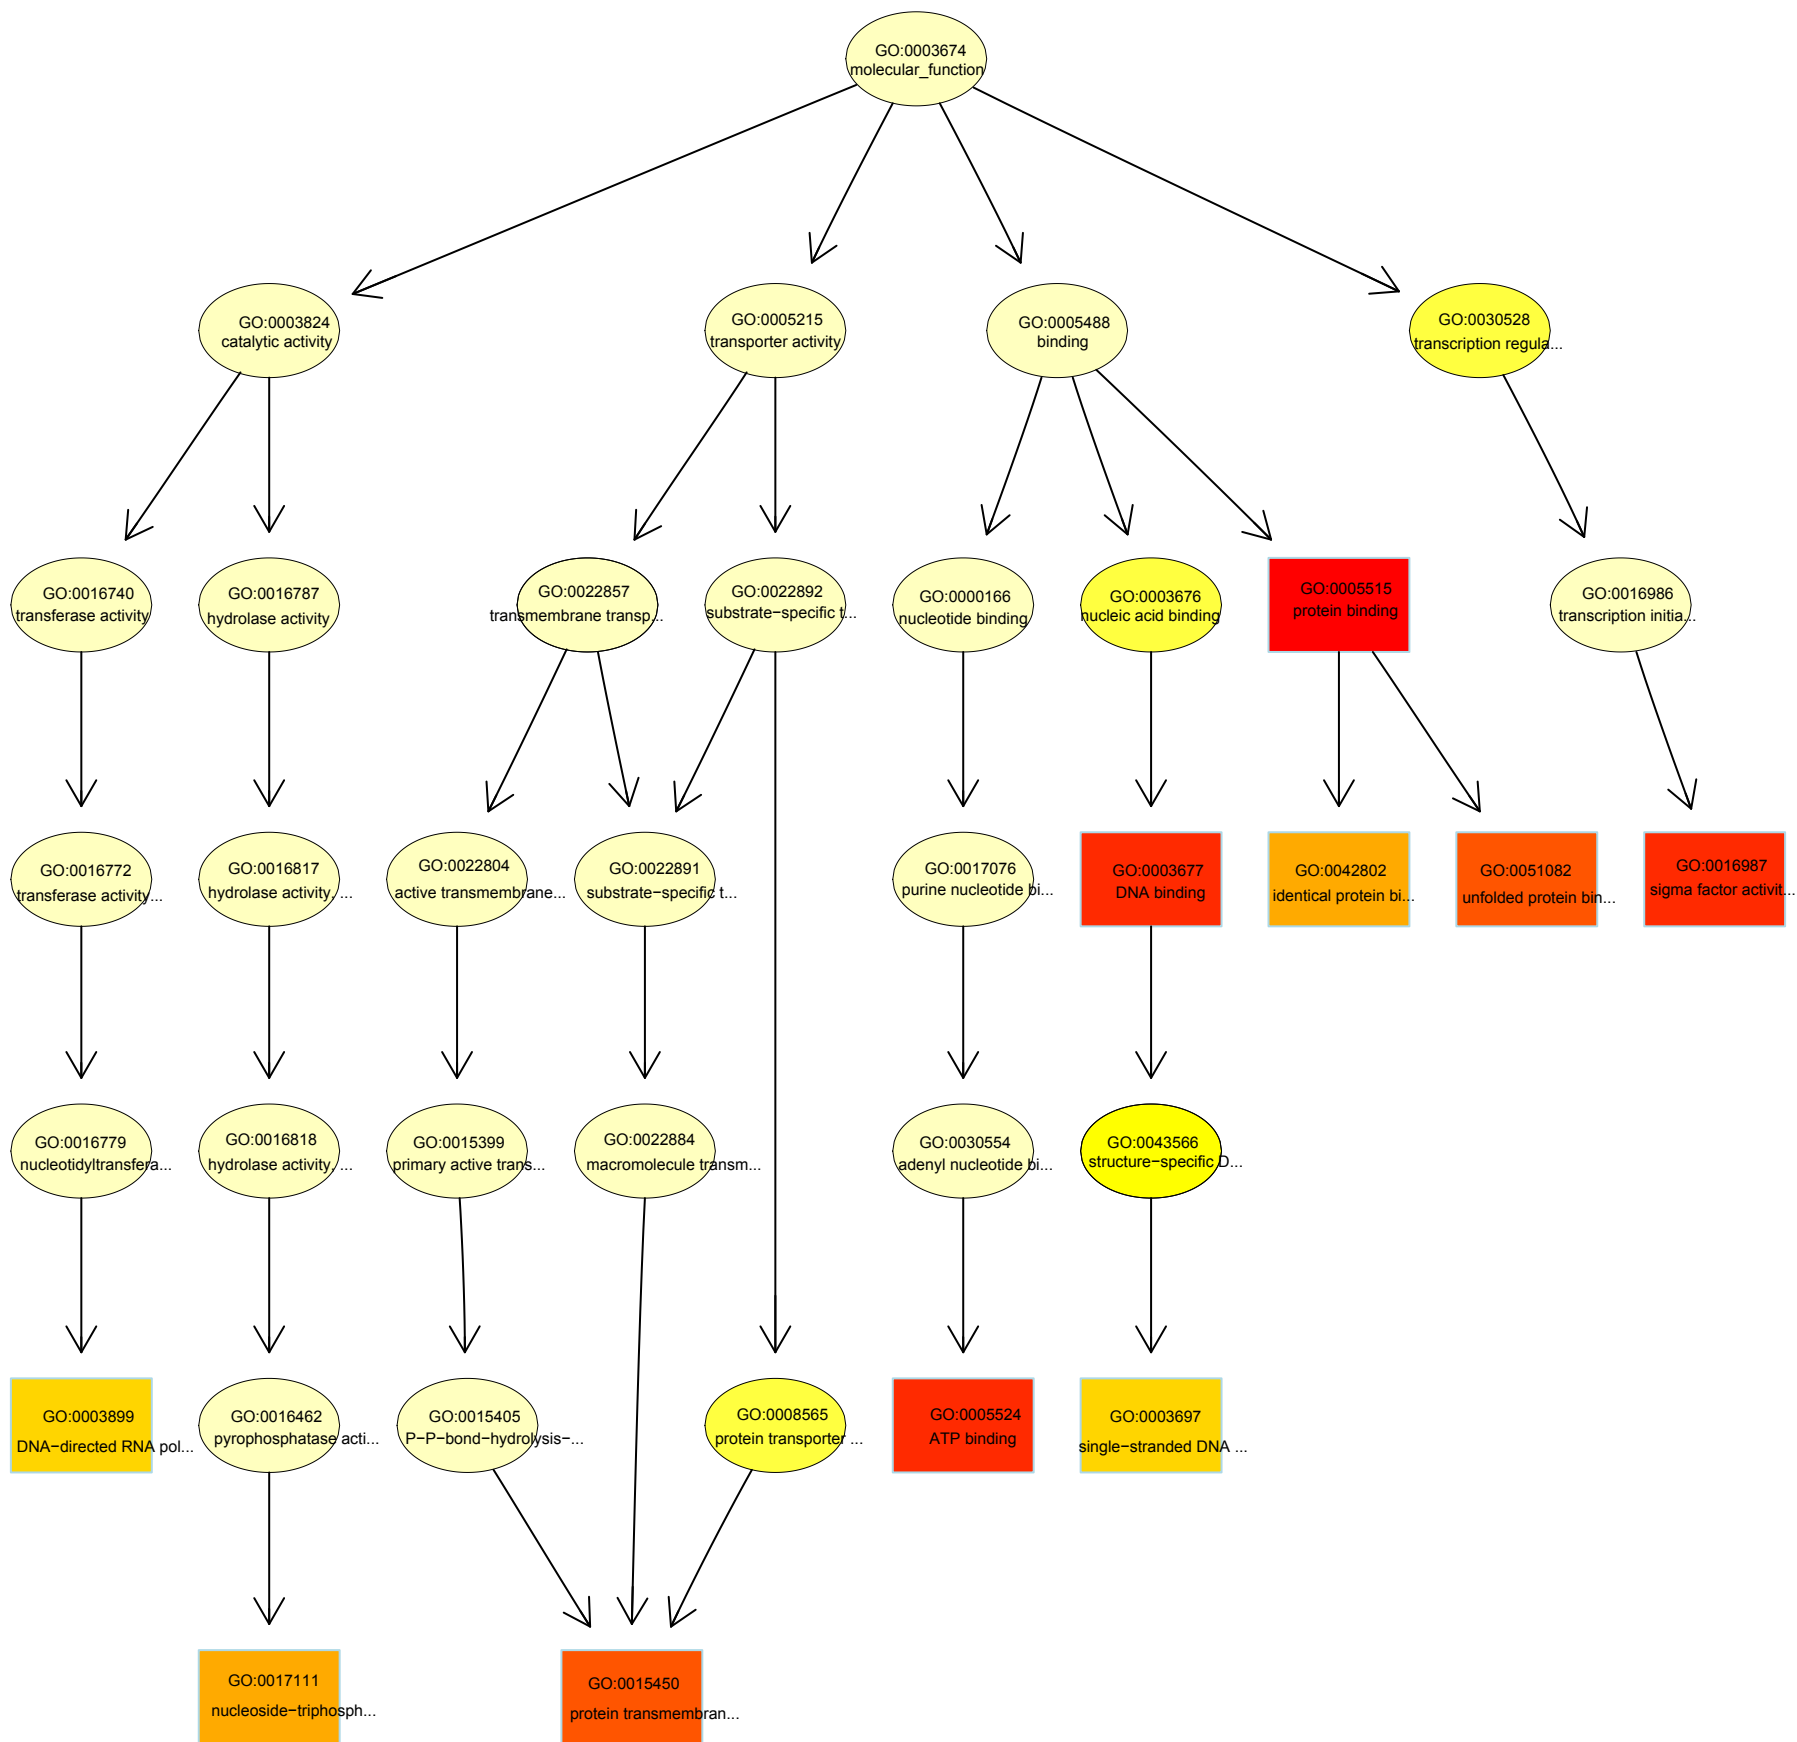

Supplement: btn481_1.pdf [file btn481_1.pdf]
